# Supplementary material for: Incident Atrial Fibrillation and In-Hospital Mortality in SARS-CoV-2 Patients
Source: MDPI journal article supplement (doi:10.3390/biomedicines10081940), 2022-08-10
Supplement: s1 [file s1]

**Table S1:** Cox regression model for incident AF with stepwise backward variable selection including admission therapies (variables with  $p < 0.05$  + age, sex, history of AF and antiarrhythmic. Permanent AFs were excluded).

| <b>Number = 2326; incident AF = 91</b>                            |           |                                |       |                |
|-------------------------------------------------------------------|-----------|--------------------------------|-------|----------------|
| <b>Parameter</b>                                                  | <b>HR</b> | <b>95% confidence interval</b> |       | <b>P-value</b> |
| Male (yes vs no)                                                  | 1.205     | 0.752                          | 1.933 | 0.4384         |
| Age (years)                                                       | 1.036     | 1.015                          | 1.058 | 0.0007         |
| History of AF (yes vs no)                                         | 2.450     | 1.143                          | 5.248 | 0.0212         |
| Antiarrhythmic (yes vs no)                                        | 1.786     | 0.807                          | 3.952 | 0.1525         |
| Lymphocytes ( $10^3/\mu\text{L}$ )                                | 0.472     | 0.282                          | 0.790 | 0.0043         |
| eGFR (mL/min)                                                     | 0.988     | 0.980                          | 0.997 | 0.0099         |
| ICU admission during hospitalization (yes vs no - time dependent) | 4.627     | 2.730                          | 7.843 | <0.0001        |
| Beta blockers (yes vs no)                                         | 1.615     | 1.036                          | 2.518 | 0.0342         |
| Anticoagulant (yes vs no)                                         | 0.350     | 0.146                          | 0.841 | 0.0189         |

Abbreviation: AF = Atrial Fibrillation; eGFR = estimated Glomerular Filtration Rate; ICU = Intensive Care Unit.
